# Supplementary material for: Non-destructive estimates of soil carbonic anhydrase activity and associated soil water oxygen isotope composition
Source: Copernicus journal article supplement (doi:10.5194/hess-21-6363-2017), 2017-12-15
Supplement: Supplementary file 1 [file hess-21-6363-2017-supplement.pdf]

Supplement of Hydrol. Earth Syst. Sci., 21, 6363–6377, 2017  
<https://doi.org/10.5194/hess-21-6363-2017-supplement>  
© Author(s) 2017. This work is distributed under  
the Creative Commons Attribution 4.0 License.

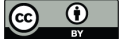

*Supplement of*

## **Non-destructive estimates of soil carbonic anhydrase activity and associated soil water oxygen isotope composition**

**S. P. Jones et al.**

*Correspondence to:* Sam P. Jones ([samuel.jones@inra.fr](mailto:samuel.jones@inra.fr))

The copyright of individual parts of the supplement might differ from the CC BY 4.0 License.

## Supplementary material

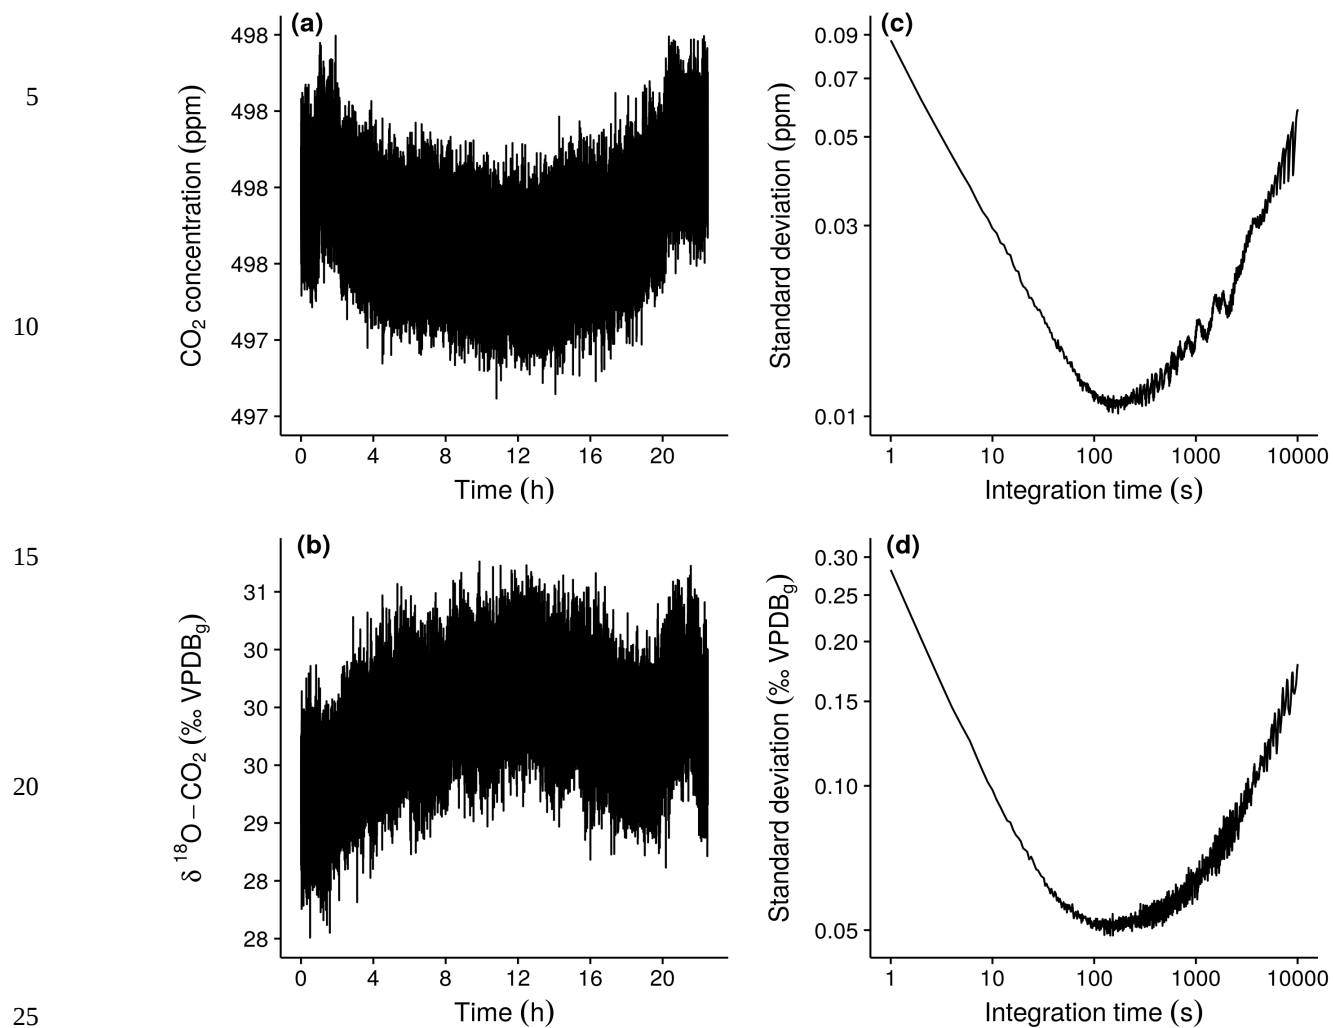

Figure S1: IRIS measurement stability for a cylinder of compressed air containing about 500 ppm of CO<sub>2</sub>. (a) 1 Hz time-series of total CO<sub>2</sub> concentration, (b) 1 Hz time-series of  $\delta^{18}\text{O}$  of CO<sub>2</sub>, (c) Allan plot of total CO<sub>2</sub> concentration and (d) Allan plot of  $\delta^{18}\text{O}$  of CO<sub>2</sub>.

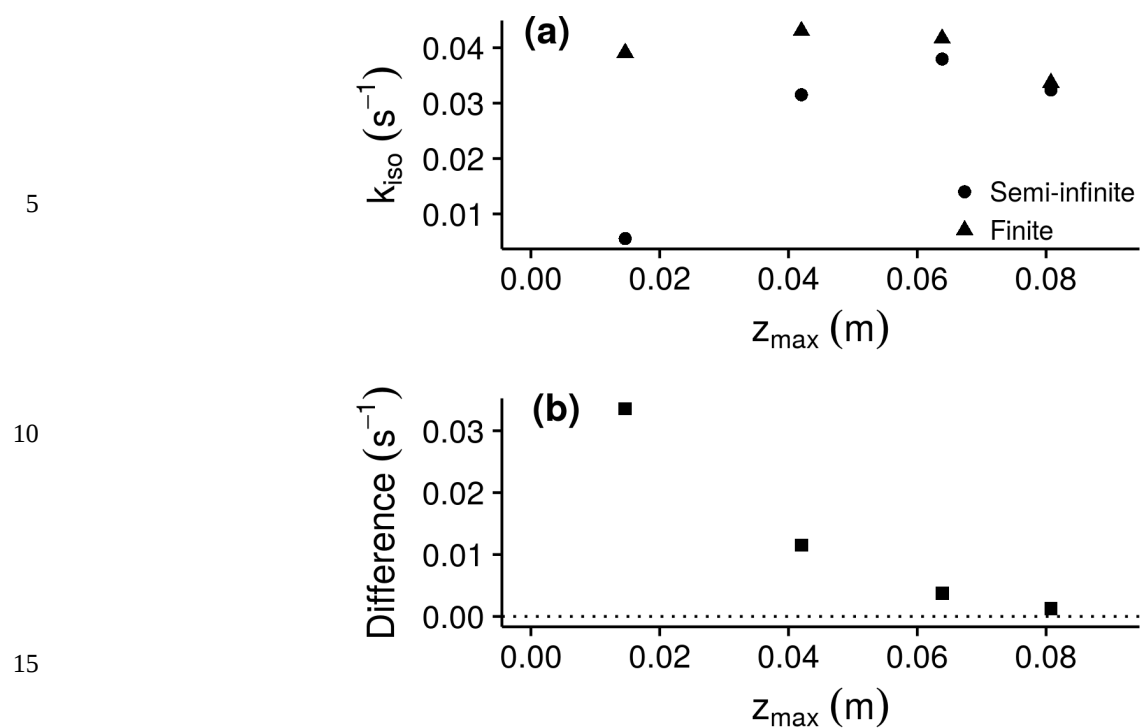

Figure S2: The influence of extending Eq. 1 to account for boundary conditions found at the bottom of incubation vessels (Eq. 7) was tested in four incubations containing 70, 100, 300 and 400 g of soil ( $\theta_w = 0.11$  to  $0.12$ ). Solutions for  $v_{inv}$  and  $\tilde{v}_{inv}$  and the corresponding semi-infinite and finite estimates of  $k_{iso}$ , calculated as described in the manuscript (a)  $k_{iso}$  estimates using the semi-infinite and the finite-depth solutions for different soil depths and (b) their difference.
